# Supplementary material for: Enhanced adsorption-based atmospheric water harvesting using a photothermal cotton rod for freshwater production in cold climates
Source: Royal Society of Chemistry journal article supplement (doi:10.1039/d1ra06987j), 2021-01-01
Supplement: d1ra06987j1.pdf [file d1ra06987j1.pdf]

## Supporting Information

### Enhanced adsorption-based atmospheric water harvesting using a photothermal cotton rod for freshwater production in cold climates

Wenchang Zhang,<sup>a,b</sup> Yu Xia,<sup>c</sup> Zhaotong Wen,<sup>b</sup> Wenxia Han,<sup>a</sup> Shaofu Wang,<sup>c</sup> Yiping Cao,<sup>b</sup>  
Rong-Xiang He,<sup>b</sup> Yumin Liu,<sup>b</sup> Bolei Chen<sup>a,b\*</sup>

<sup>a</sup>Hubei Key Laboratory of Environmental and Health Effects of Persistent Toxic Substances, School of Environment and Health, Jiangnan University, Wuhan 430056, China

<sup>b</sup>Institute for Interdisciplinary Research (IIR), Jiangnan University, Wuhan 430056, China

<sup>c</sup>School of Physics and Technology, Key Laboratory of Artificial Micro/Nano Structures, Ministry of Education, Wuhan University, Wuhan 430072, China

E-mail: [bl\\_chen@jhu.edu.cn](mailto:bl_chen@jhu.edu.cn) (Dr. B.L. Chen);

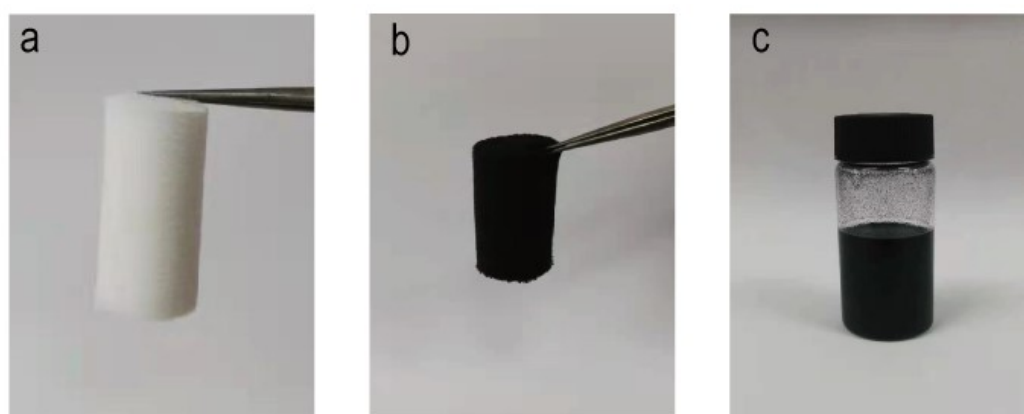

**Fig. S1** The optical photos of (a) raw cotton rod, (b) CNTs-CILs@ cotton rod, (c) CILs and CNTs suspension.

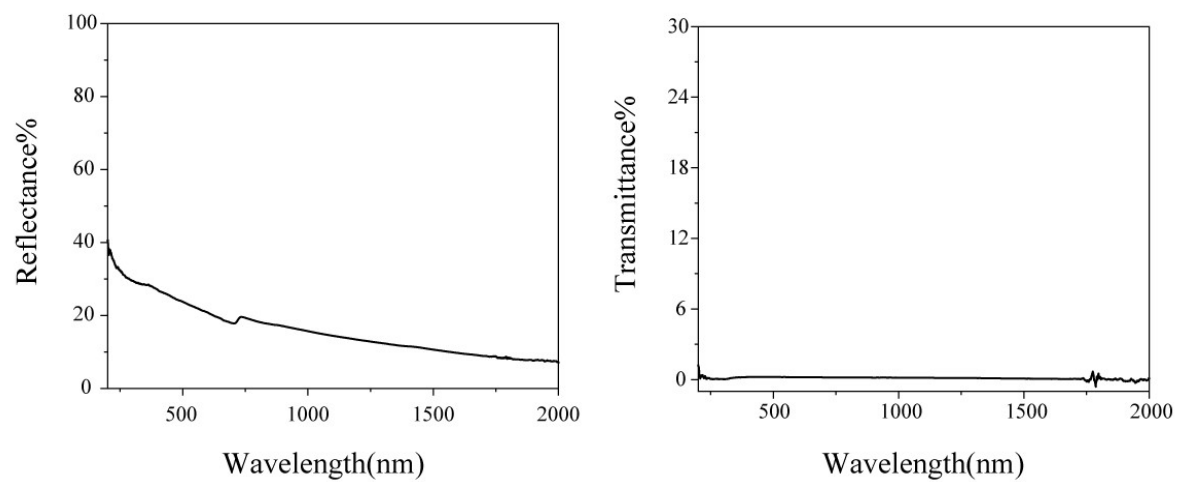

s

**Fig. S2** The reflection and transmission spectra of CILs-CNTs mixtures.

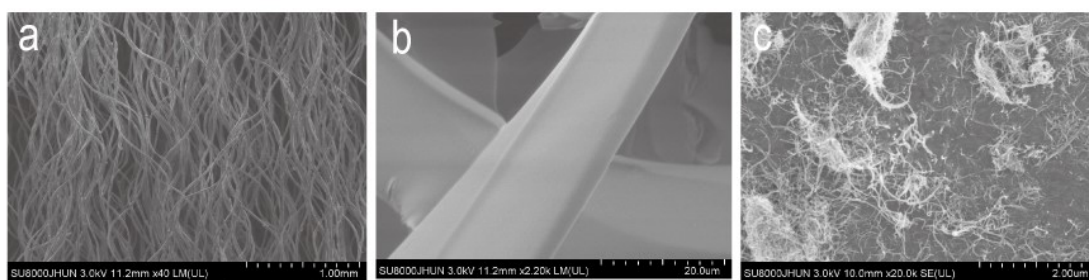

**Fig. S3** The SEM of the (a), (b) raw cotton fiber, (c) carbon nanotubes on cotton fiber.

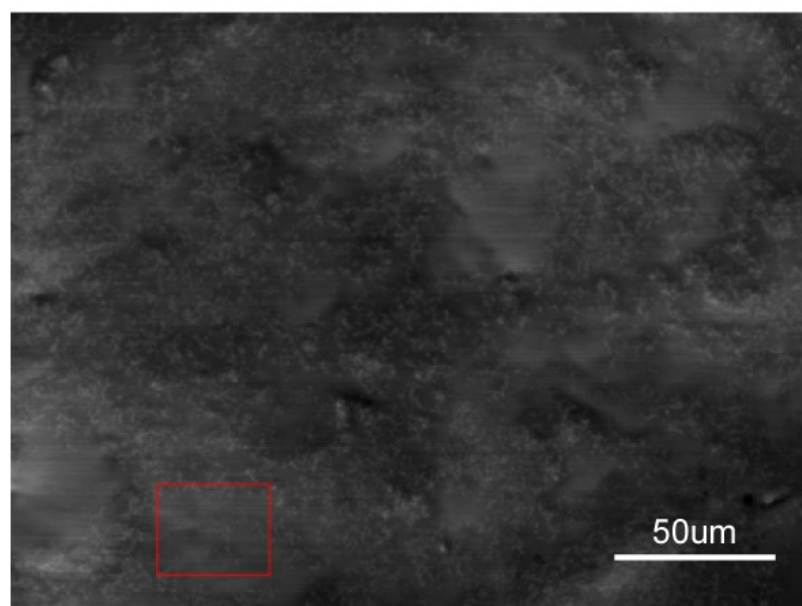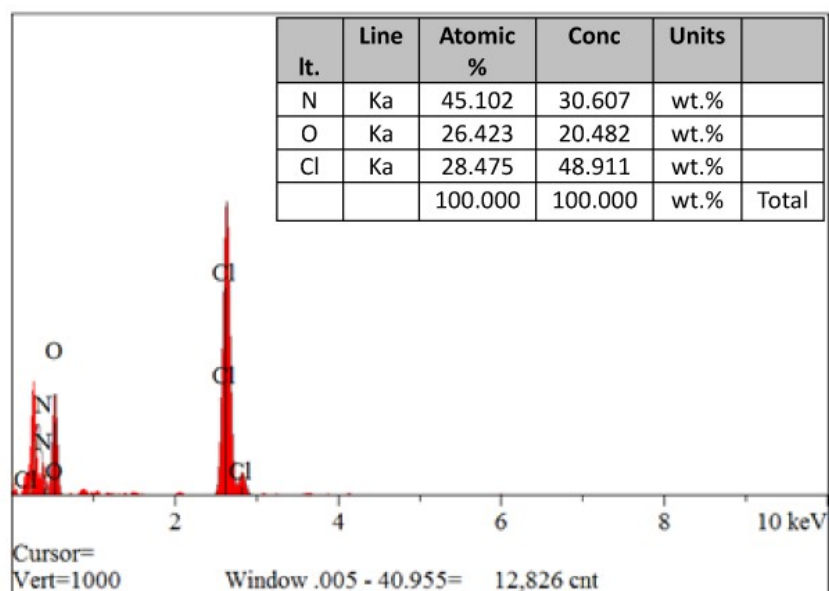

**Fig. S4** The SEM-EDS of CIL and CNTs mixtures.

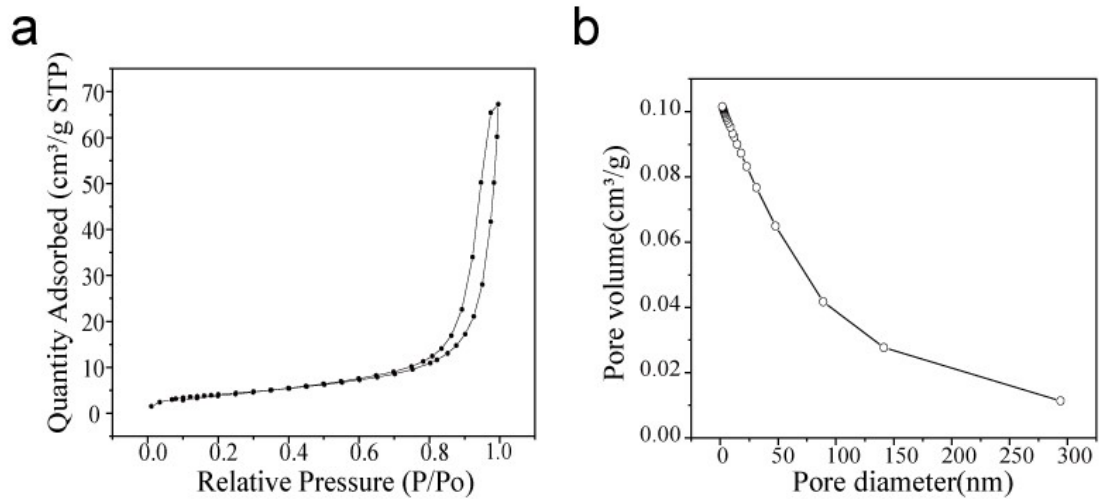

**Fig. S5** (a) Nitrogen sorption isotherm of CNTs-CILs@ cotton rod. (b) Pore size distribution of CNTs-CILs@ cotton rod.

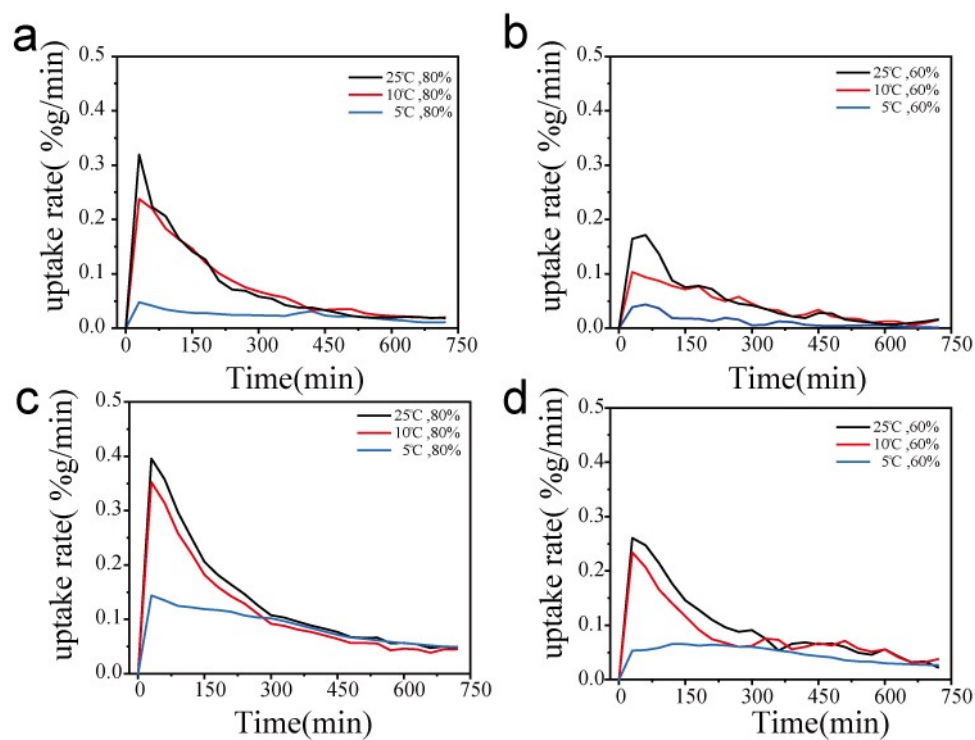

**Fig. S6** The water absorption rate curves of [C<sub>2</sub>OHmim]Cl at different temperature under (a) 80% humidity, (b) 60%. The water absorption rate curves of CILs([C<sub>2</sub>OHmim]Cl : LiCl = 7 : 3) at different temperature under (c) 80% humidity, (d)60%.

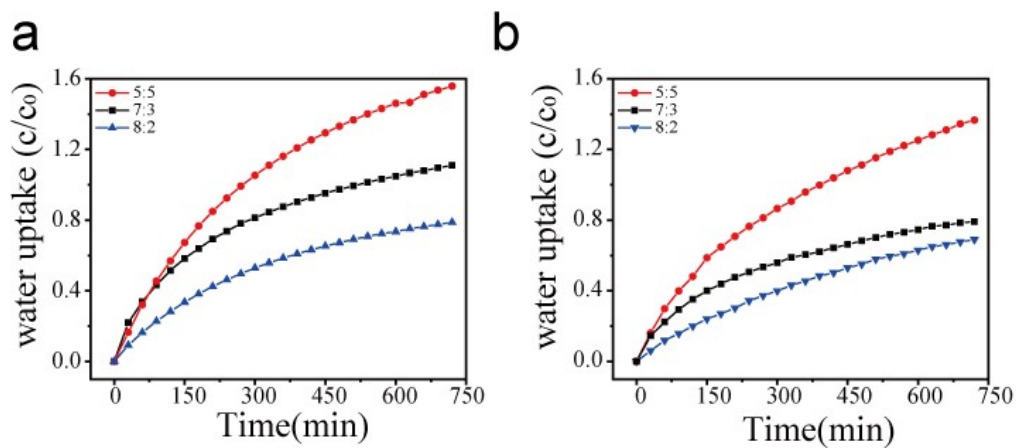

**Fig. S7** The water absorption curves of C<sub>2</sub>OHmim]Cl/LiCl composite (the ratio of C<sub>2</sub>OHmim]Cl/LiCl = 5:5, 7:3 and 8:2) at (a) 25 °C and RH~80%, (b) at 10 °C and RH~80 %.

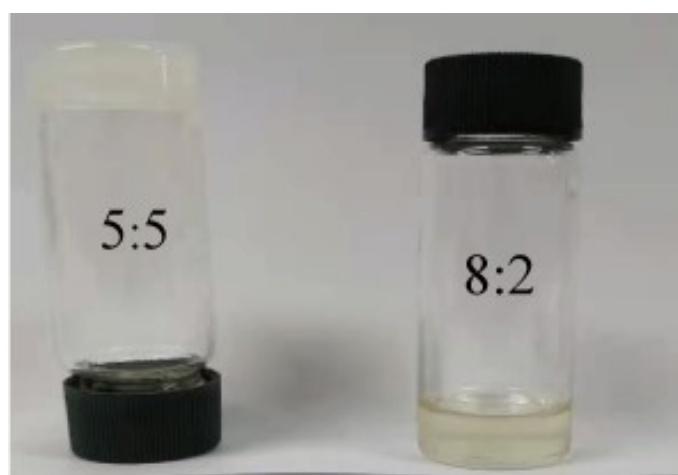

**Fig. S8** The optical photos of different  $[\text{C}_2\text{OHmim}]\text{Cl}/\text{LiCl}$  ratio

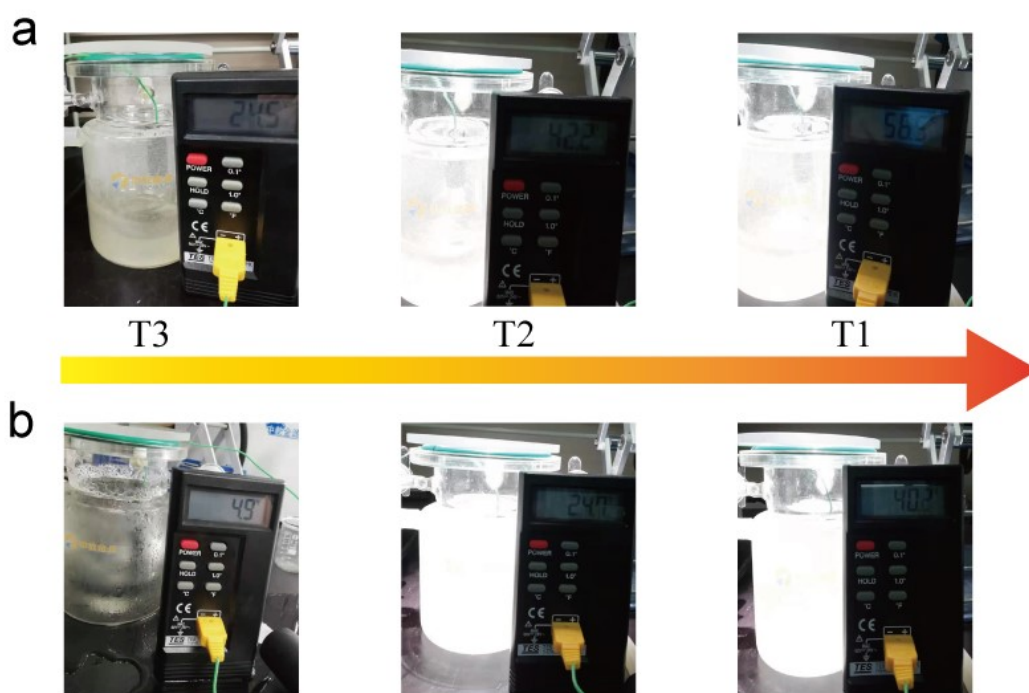

**Fig. S9** The optical photos of the CNTs-CILs@ cotton temperature measurements by using thermistor probe at environmental temperature of (a) 25 °C, (b) 5 °C under solar irradiation

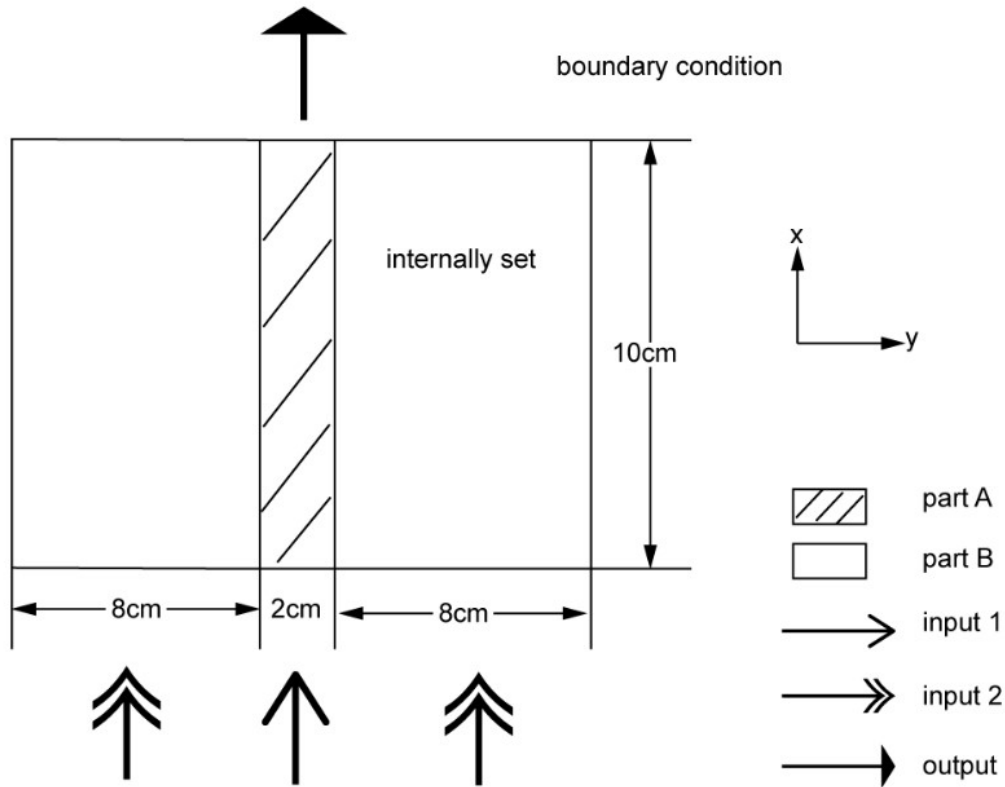

**Fig. S10** The scheme of heat flow simulation.

The heat flow over the model was simulated by using CDF software (FLUENT). The temperature distribution over the airflow system was simulated by the heat transfer and turbulence model. The boundary condition includes the input 1, input 2 and output which simulated heat flow of air flow and heat energy as shown in Supporting Figure 1. In input 1, the air velocity is 0.01 m/s, the temperature is 350 K which simulated heat flow of cotton rod. In input 2, the air velocity is set 0.01 m/s, the temperature is 300 K which simulated heat flow of environment. In output, the the air velocity is 0 m/s, the temperature is 300 K. Input 1 associates with part A and input 2 associates with part B. The internally set includes material model and simulation formula. Part A is porous corban material with 0.1 of porosity. The pores are filled with air. Part B is air. In Part A, relative velocity resistance formulation and viscous resistance (inverse absolute permeability) are used to simulate. The viscosity resistance parameter is  $3 \times 10^9$  in X axis,  $3 \times 10^7$  in Y axis. The inertial resistance parameter is 15000 in X axis, 1500 in Y axis. This part has added in supporting information.

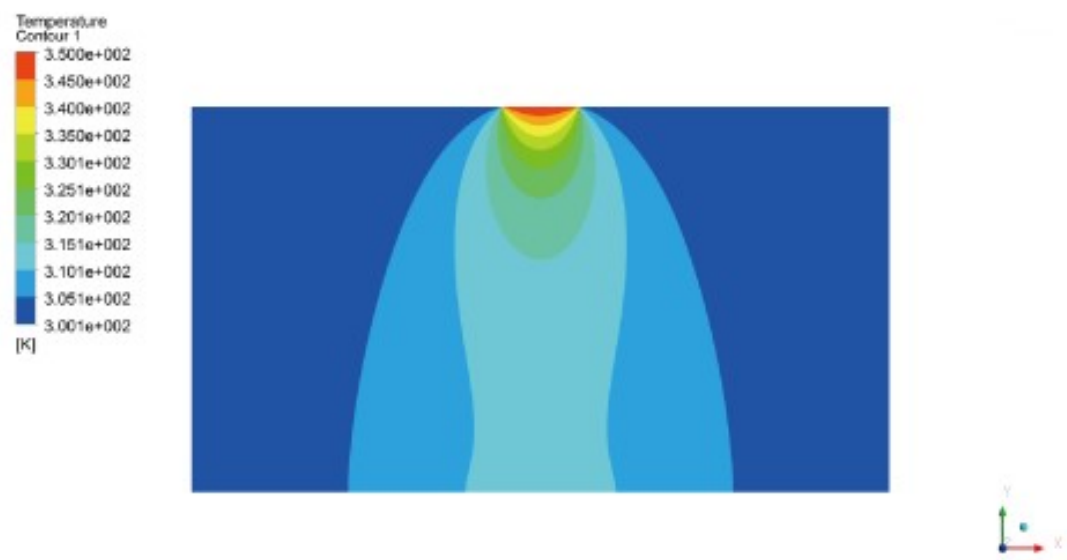

**Fig. S11** The heat flow simulation image in air when T1 is 350 K.

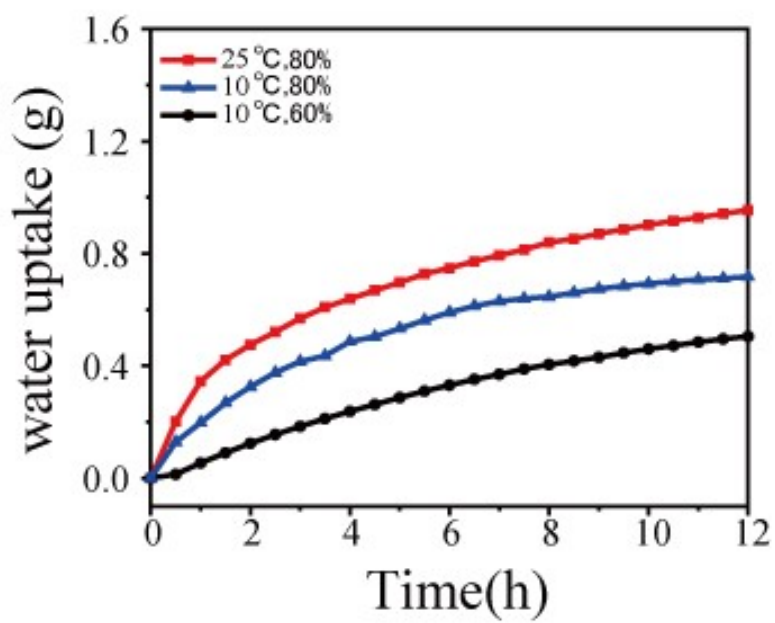

**Fig. S12** The mass increase of the CNTs-CILs@ cotton rods after water sorption in different temperature and humidity.

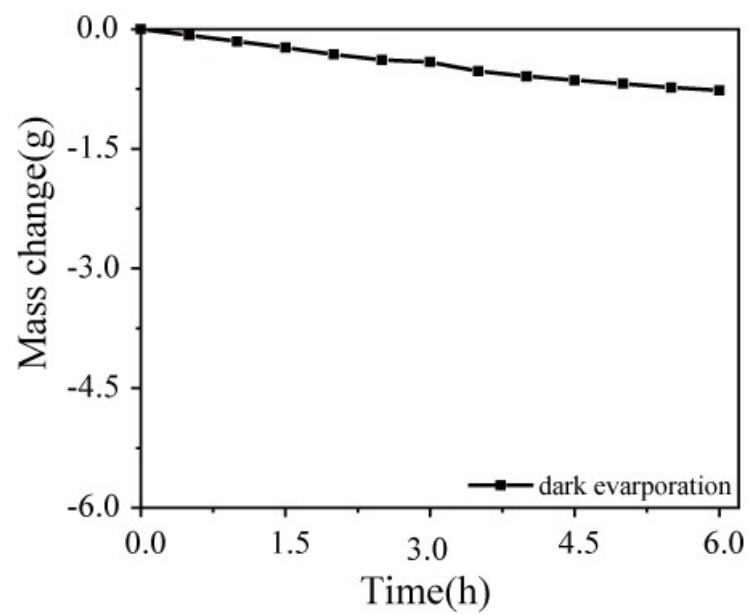

**Fig. S13** Mass change of wet CNTs-CILs@ cotton rod in dark condition.

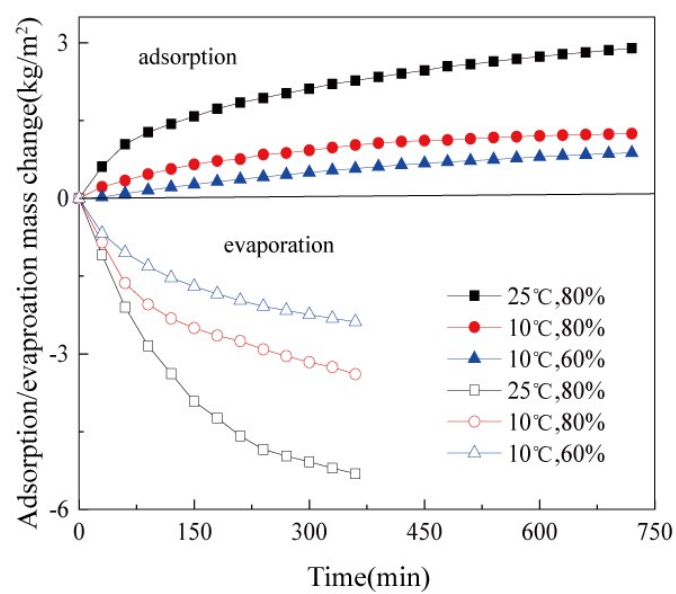

**Fig. S14** The water absorption/evaporation curves of CNTs-CILs@ cotton rod at different condition.

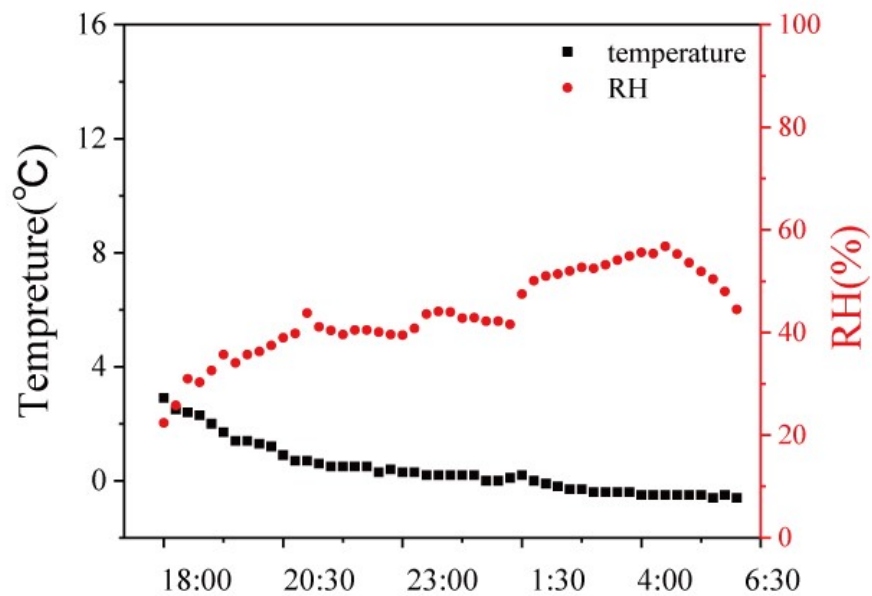

**Fig. S15** The variety of environmental temperature and relative humidity changes during the ABAWH device water absorption in nighttime.

**Table S1.** The summary of literature on liquid sorption atmospheric water adsorption.

| Reference               | Sorbent                                      | Working conditions | Water adsorption              |
|-------------------------|----------------------------------------------|--------------------|-------------------------------|
| Heshan Qi et al.[1]     | [EMIM][Ac]                                   | RH=80%,12h         | 1.18g/g <sub>o</sub>          |
| Heshan Qi et al. [1]    | LiCl saturated solution(40 wt%)              | RH=80%,12h         | 1.0g/g <sub>o</sub>           |
| Renyuan Li et al.[2]    | CaCl <sub>2</sub> saturated solution(50 wt%) | RH=60%,12h         | 0.48g/g <sub>o</sub>          |
| Yuanyuan Cao et al. [3] | [AMIM][Cl]                                   | RH=52%,3h          | 0.18g/g <sub>o</sub>          |
| Yuanyuan Cao et al. [3] | [ABIM][Cl]                                   | RH=52%,3h          | 0.12g/g <sub>o</sub>          |
| Feng Ni et al. [4]      | glycerin                                     | RH=90%,12h         | 2kg/m <sup>2</sup>            |
| Our work                | CILs                                         | RH=80%,12h(3h)     | 1.6g/g(0.76g/g <sub>o</sub> ) |
| Our work                | CILs                                         | RH=60%,12h(3h)     | 0.8g/g(0.56g/g <sub>o</sub> ) |

## References

- [1] H. Qi, T. Wei, W. Zhao, B. Zhu, G. Liu, P. Wang, Z. Lin, X. Wang, X. Li, X. Zhang and J. Zhu, *Adv Mater*, 2019, **31**, e1903378..
- [2] R. Li, Y. Shi, M. Alsaedi, M. Wu, L. Shi and P. Wang, *Environ Sci Technol*, 2018, 52, 11367-11377.
- [3] Y. Cao, Y. Chen, L. Lu, Z. Xue and T. Mu, *Industrial & Engineering Chemistry Research*, 2013, 52, 2073-2083.
- [4] Ni, F.; Qiu, N.; Xiao, P.; Zhang, C.; Jian, Y.; Liang, Y.; Xie, W.; Yan, L.; Chen, T., Tillandsia-Inspired Hygroscopic Photothermal Organogels for Efficient Atmospheric Water Harvesting. *Angew Chem Int Ed Engl* 2020, 59 (43), 19237-1924.
